# Supplementary material
Source: PubMed Central journal article supplement (PMC2596342)
Supplement: M800065-MCP200_1.pdf [file M800065-MCP200_1.pdf]

## SUPPLEMENTARY FIGURE LEGENDS

Supp Fig 1. Annotated ESI-MS/MS spectra of the synthetic peptides a) EY\*RKDLLEESIR and b) KVQHELDEAEER, where \* indicates nitration. The MS/MS spectrum of Figure 2 of Hong et al. (21) agrees with that of KVQHELDEAEER (b) and not with that of EY\*RKDLLEESIR proposed.

Supp Fig 2. Annotated ESI-MS/MS spectrum of the synthetic peptide DQEGQDVLLFIDNIFR. After comparison with the MS/MS spectrum previously published by Hong et al. (21) in Figure 3 of their publication, the MS/MS spectrum of this unmodified peptide confirmed their misidentification, even if the peptide ERYAAW(oxM)IY\*TY\*SGLFCVTVNPYK suggested was not prepared and analyzed due to limitations of routine SPPS for this complex peptide.

Supp Fig 3. Annotated ESI-MS/MS spectra of the synthetic peptides a) SYKY\*LLLSMVK and b) NLVHIITHGEEK, where \* indicates nitration. The MS/MS spectrum of Figure 5 of Hong et al. (21) agrees with that of NLVHIITHGEEK (b) and not with that of SYKY\*LLLSMVK proposed.

Supp Fig 4. Annotated ESI-MS/MS spectra of the synthetic peptides a) LPKNY(oxM)(oxM)SNGY\*K and b) QRGHY\*VGVPT(oxM)RDDPK, where \* and oxM indicates nitration and oxidized methionine, respectively. Misidentifications by Gokulrangan et al. could be confirmed by comparison of the MS/MS spectra of these

synthetic peptides to those of Figure 5 and Figure 7, respectively, in their published paper (22).

Supp Fig 5. a) ESI-MS/MS spectrum of the synthetic peptide DSY\*VAIANACCAPR as reported in Figure 2 of Sacksteder et al. (26) and b) the non-nitrated synthetic peptide @DSYVAIADACCAPR<sup>1</sup> where @ and <sup>1</sup> indicate modification of the N-terminus and C-terminal arginine by carbamoylation, respectively (note also the replacement of N with D to mimic deamidation).

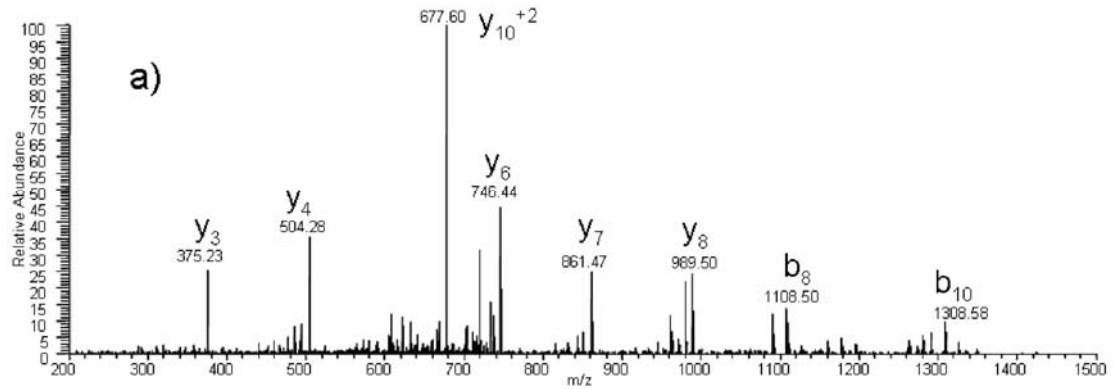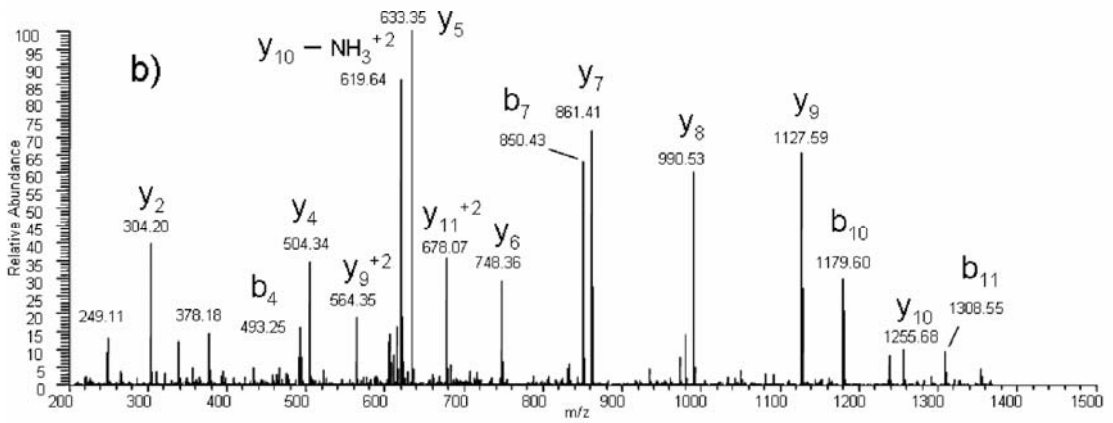

Supplementary Figure 1

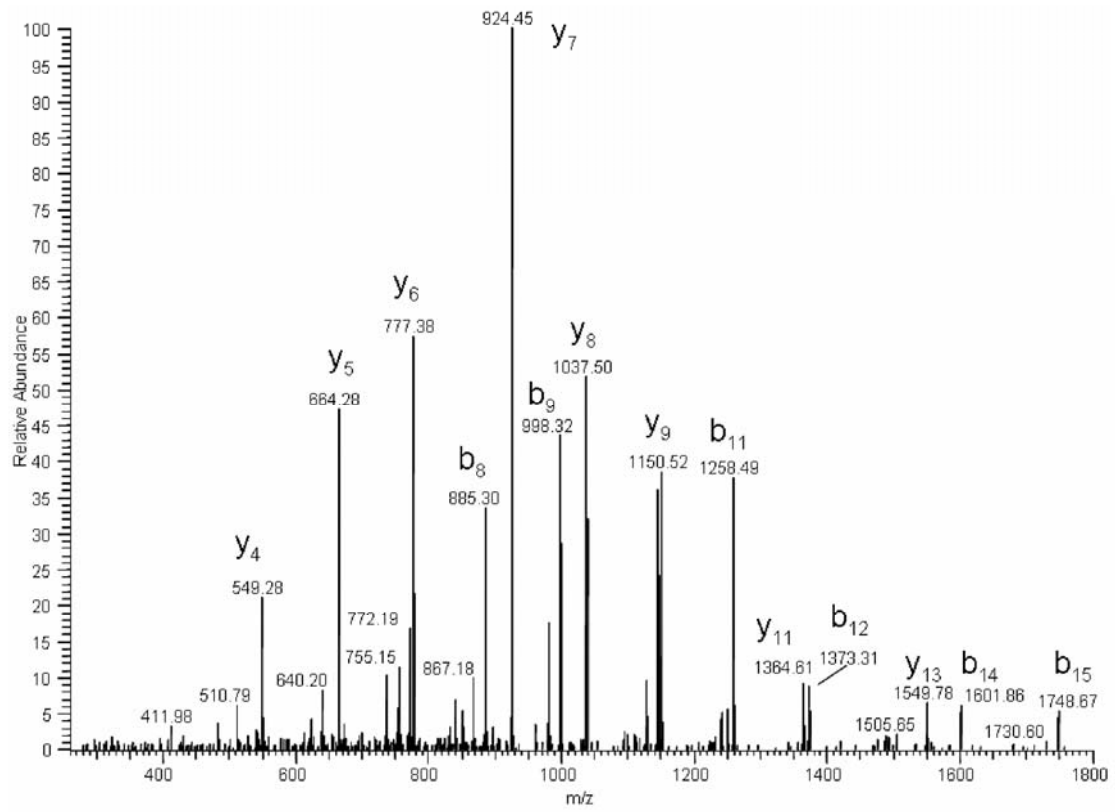

Supplementary Figure 2

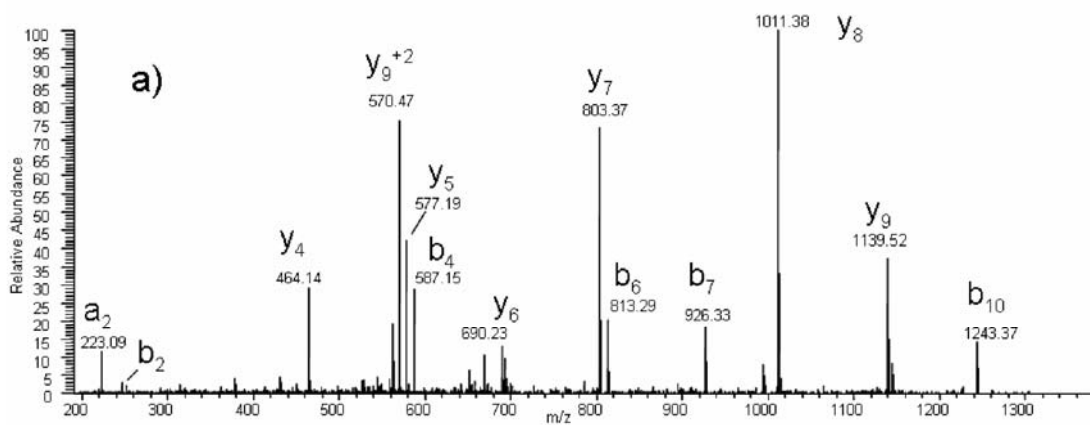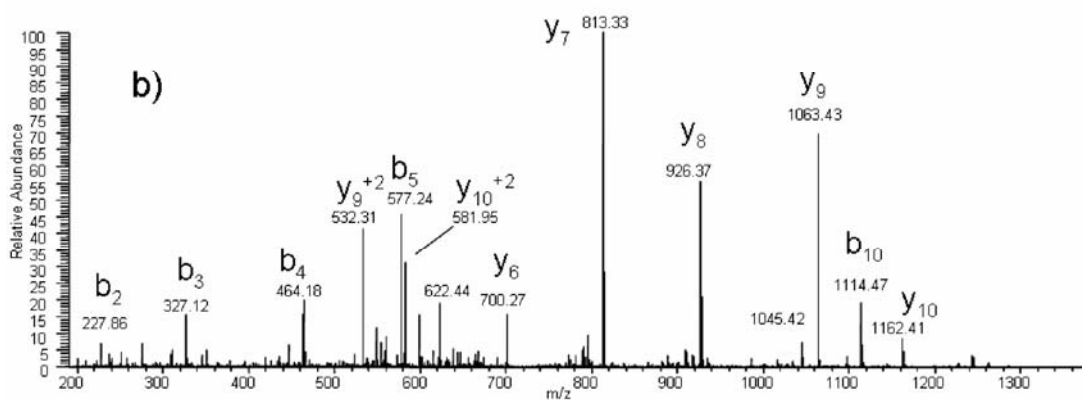

Supplementary Figure 3

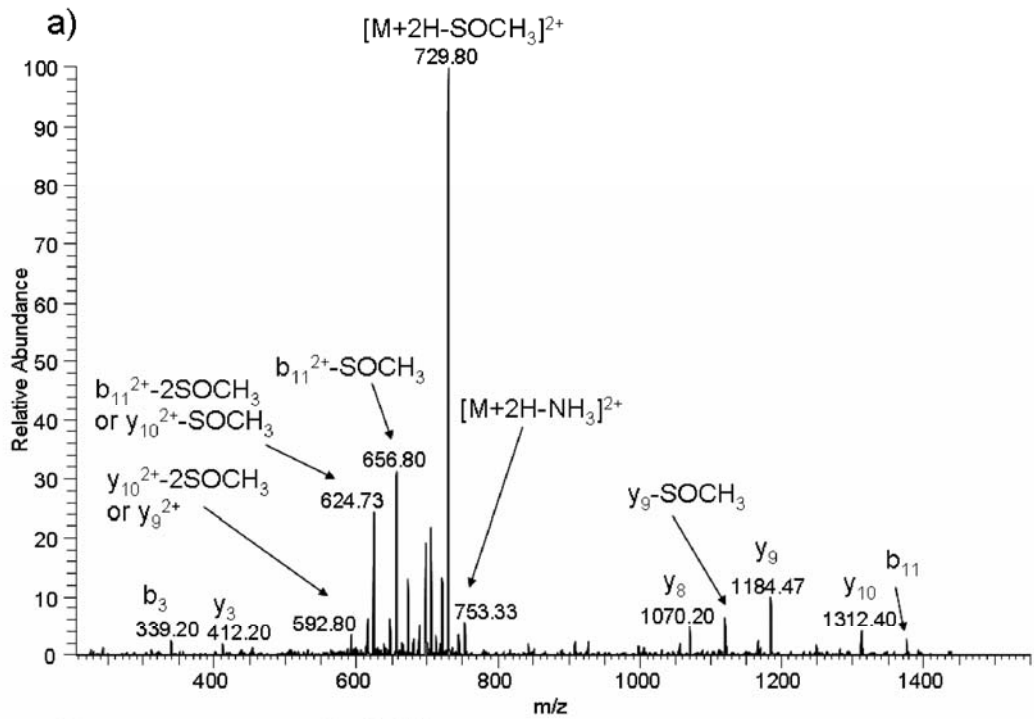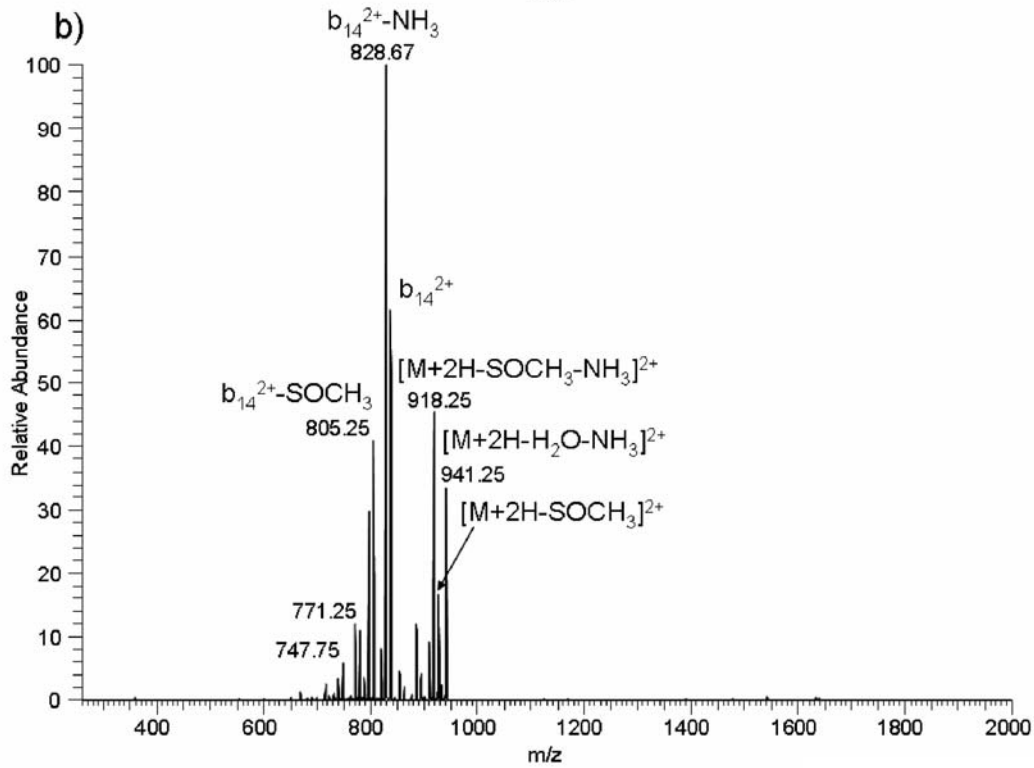

Supplementary Figure 4

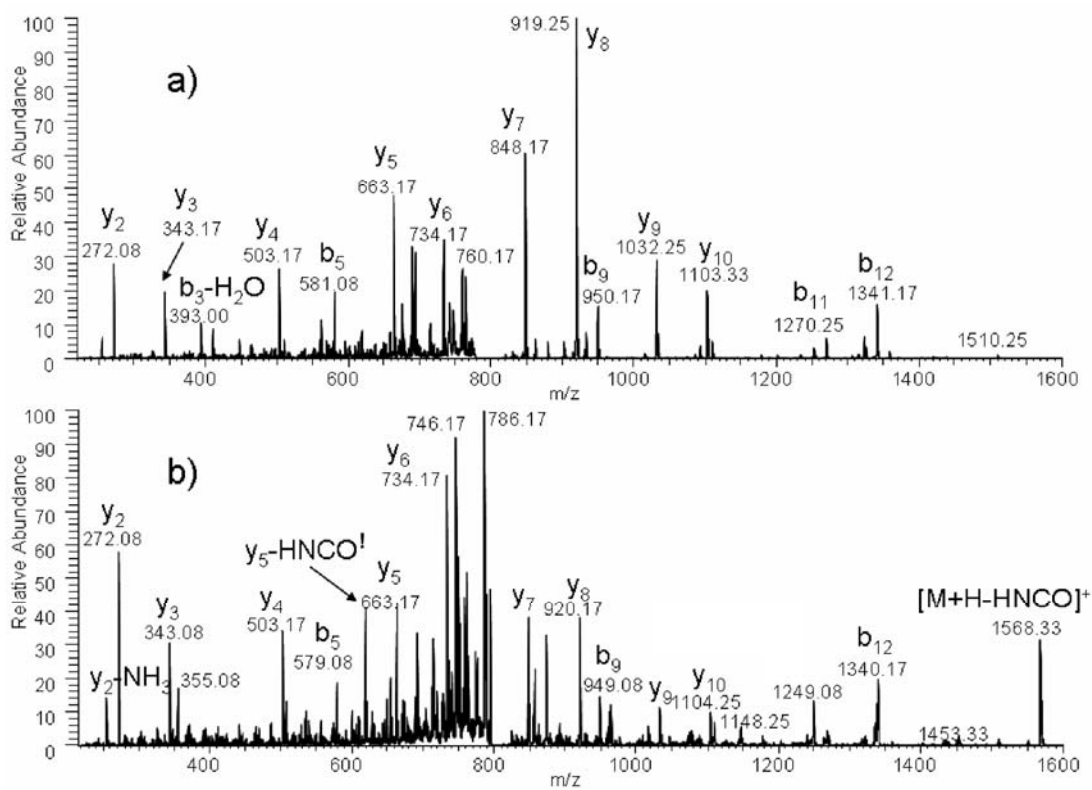

Supplementary Figure 5
